# Supplementary material for: Stable lithium metal anodes enabled by inorganic/organic double-layered alloy and polymer coating
Source: Royal Society of Chemistry journal article supplement (doi:10.1039/c9ta09523c), 2019-01-01
Supplement: c9ta09523c1.pdf [file c9ta09523c1.pdf]

## Supplementary information for

### Stable lithium metal anodes enabled by inorganic/organic double-layered alloy and polymer coating

Yuanjun Zhang,<sup>‡a</sup> Guanyao Wang,<sup>‡a</sup> Liang Tang,<sup>b</sup> Jiajie Wu,<sup>c</sup> Bingkun Guo,<sup>c</sup> Ming Zhu,<sup>d</sup> Chao Wu,<sup>\*ad</sup> Shi Xue Dou,<sup>d</sup> and Minghong Wu<sup>\*b</sup>

<sup>a</sup>*School of Environmental and Chemical Engineering, Shanghai University, Shanghai 200444, China*

<sup>b</sup>*Shanghai Applied Radiation Institute, Shanghai University, Shanghai 200444, China. Email: [mhwu@shu.edu.cn](mailto:mhwu@shu.edu.cn)*

<sup>c</sup>*Materials Genome Institute, Shanghai University, Shanghai, 200444, China*

<sup>d</sup>*Institute for Superconducting & Electronic Materials, Australian Institute of Innovative Materials, University of Wollongong, NSW 2522, Australia. Email: [chaowu@uow.edu.au](mailto:chaowu@uow.edu.au)*

<sup>‡</sup> These two authors contributed equally to this work.

**Table S1** The price comparison of different metal salts for fabricating the lithiophilic alloy.

| Chemicals         | Brand         | Price (\$/g)* | Reference |
|-------------------|---------------|---------------|-----------|
| GeCl <sub>4</sub> | Sigma-Aldrich | 21.6          | 1         |
| InF <sub>3</sub>  | Sigma-Aldrich | 41.6          | 2         |
| SnCl <sub>4</sub> | Sigma-Aldrich | 9.32          | 3         |
| SnTFSI            | Alfa Aesar    | 224.6         | 4         |
| ZnCl <sub>2</sub> | Sigma-Aldrich | 12.3          | 5         |
| InCl <sub>3</sub> | Sigma-Aldrich | 9.2           | 5         |
| BiCl <sub>3</sub> | Sigma-Aldrich | 3.7           | 5         |
| SbF <sub>3</sub>  | Sigma-Aldrich | 2.5           | This work |

\*The price was recorded on 2019/07/26

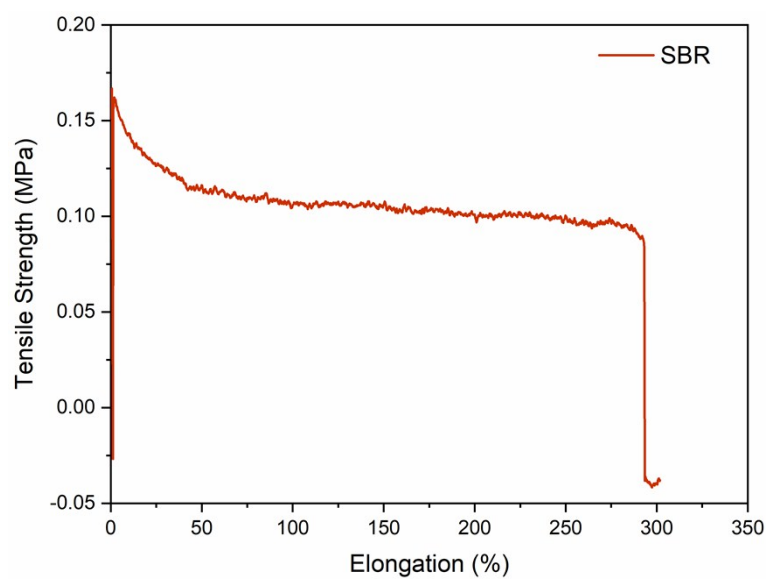

**Fig.S1** The tensile strength of commercial SBR.

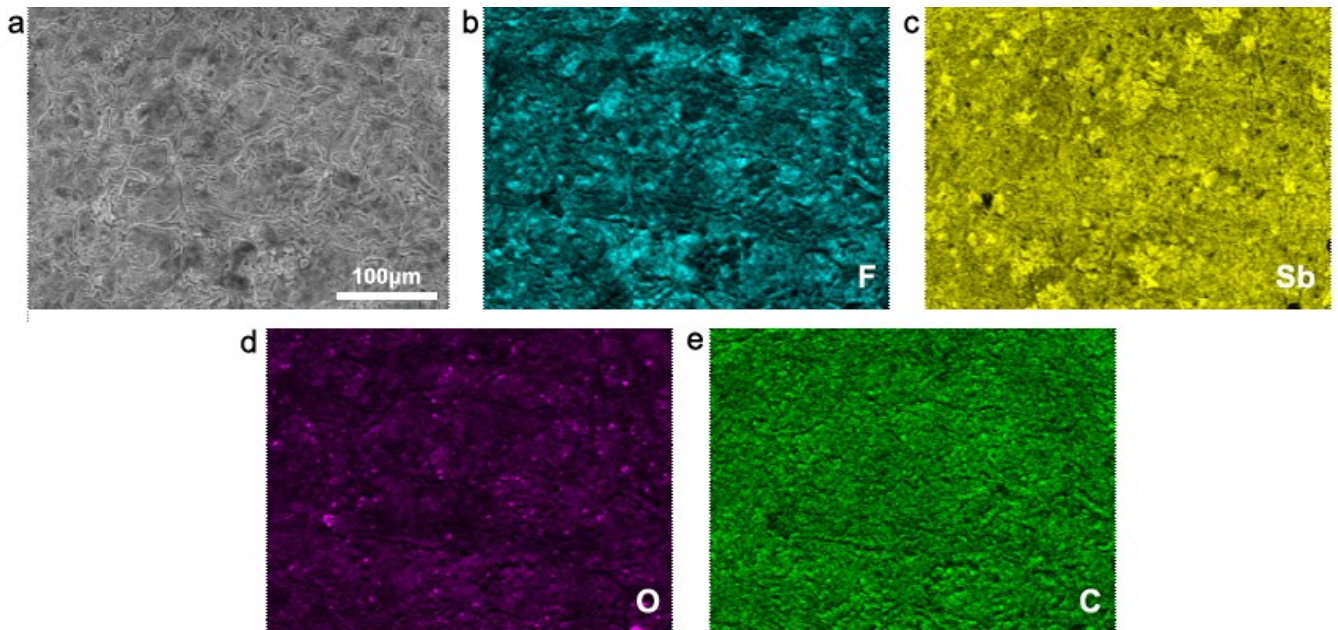

**Fig. S2** The SEM image (a) and EDS mapping images of Li|Li-Sb-alloy electrode: (b) F, (c) Sb, (d) O, and (e) C.

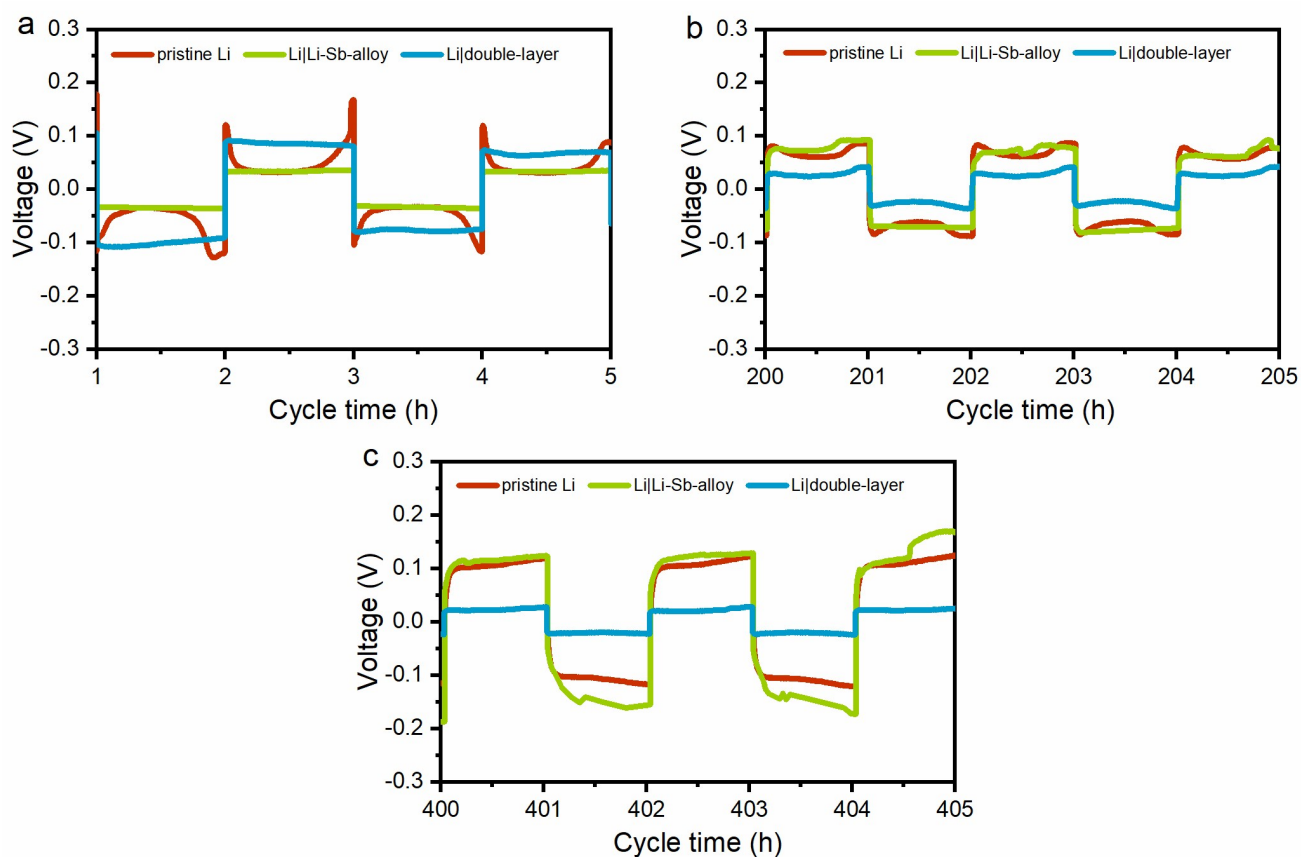

**Fig. S3** Enlarged views for cycling performance of Li|Li symmetric cells containing pristine Li, Li|Li-Sb-alloy, and Li|double-layer under current density of  $1 \text{ mA cm}^{-2}$  for 1 h at different cycling times: (a) 1-5 h, (b) 200-205 h, and (c) 400-405 h. The electrolyte was 1 M  $\text{LiPF}_6$  in EC/DEC (1:1, v/v).

**Table S2** The comparison between double-layer protected lithium foils and other treated lithium foils reported in the previous literatures.

| Electrolyte                                                              | Modifications/treatments                         | Current density & capacity                         | Plating/Stripping time | Overpotential    | Reference |
|--------------------------------------------------------------------------|--------------------------------------------------|----------------------------------------------------|------------------------|------------------|-----------|
| 1M LiPF <sub>6</sub> EC/DMC (1:1, v/v) with 60 mM InF <sub>3</sub>       | InF <sub>3</sub> treated Li                      | 1 mA cm <sup>-2</sup> ,<br>1 mA h cm <sup>-2</sup> | 400 h                  | 167 mV           | 2         |
| 1M LiPF <sub>6</sub> EC/DMC (1:1, v/v)                                   | PECA & LiNO <sub>3</sub> treated Li              | 1 mA cm <sup>-2</sup> ,<br>1 mA h cm <sup>-2</sup> | 400 h                  | 74 mV            | 6         |
| 1M LiPF <sub>6</sub> +0.2 M SiCl <sub>4</sub> in PC                      | SiCl <sub>4</sub> treated Li                     | 1 mA cm <sup>-2</sup> ,<br>1 mA h cm <sup>-2</sup> | 100 h                  | 86 mV            | 7         |
| 1M LiPF <sub>6</sub> in EC/DMC/DEC (1:1:1, v/v/v)                        | PAA treated Li                                   | 1 mA cm <sup>-2</sup> ,<br>1 mA h cm <sup>-2</sup> | 250 h                  | 120 mV           | 8         |
| 1 M LiPF <sub>6</sub> in EC/DEC (1:1, v/v)                               | carbonized wood as Li host                       | 1 mA cm <sup>-2</sup> ,<br>1 mA h cm <sup>-2</sup> | 330 h                  | 86 mV            | 9         |
| 1.3 M LiPF <sub>6</sub> in EC/DEC (3:7, v/v) with 0.01 mg/mL carbon dots | carbon dots as electrolyte additives             | 1 mA cm <sup>-2</sup> ,<br>1 mA h cm <sup>-2</sup> | 250 h                  | 122 mV           | 10        |
| 1M LiPF <sub>6</sub> EC/EMC/DMC (1:1:1, v/v/v)                           | zinc phosphate treated Li                        | 1 mA cm <sup>-2</sup> ,<br>1 mA h cm <sup>-2</sup> | 500 h<br>600 h         | 130 mV<br>280 mV | 11        |
| 1 M LiPF <sub>6</sub> in EC/DEC (1:1, v/v)                               | SbF <sub>3</sub> & SBR double layer protected Li | 1 mA cm <sup>-2</sup> ,<br>1 mA h cm <sup>-2</sup> | 500 h                  | 21 mv            | This work |

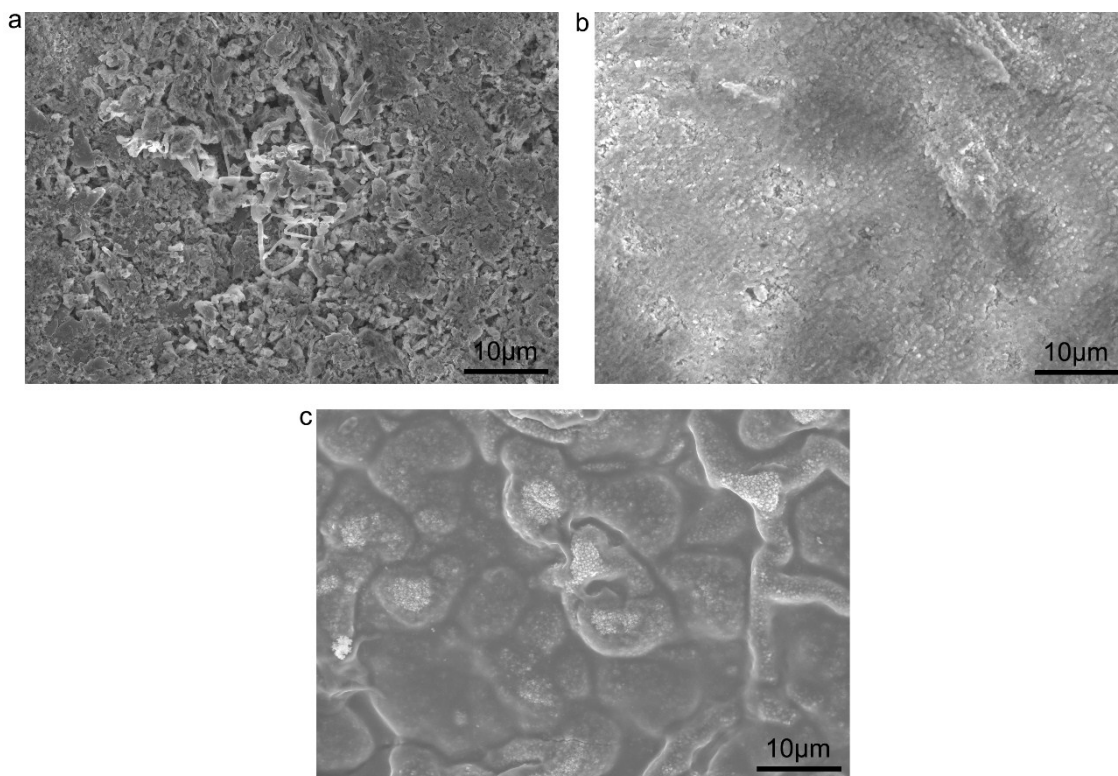

**Fig. S4** Top-view SEM images of (a) pristine Li, (b) Li|Li-Sb-alloy, and (c) Li|double-layer after cycling for 100 h. The electrolyte was 1 M LiPF<sub>6</sub> in EC/DEC (1:1, v/v).

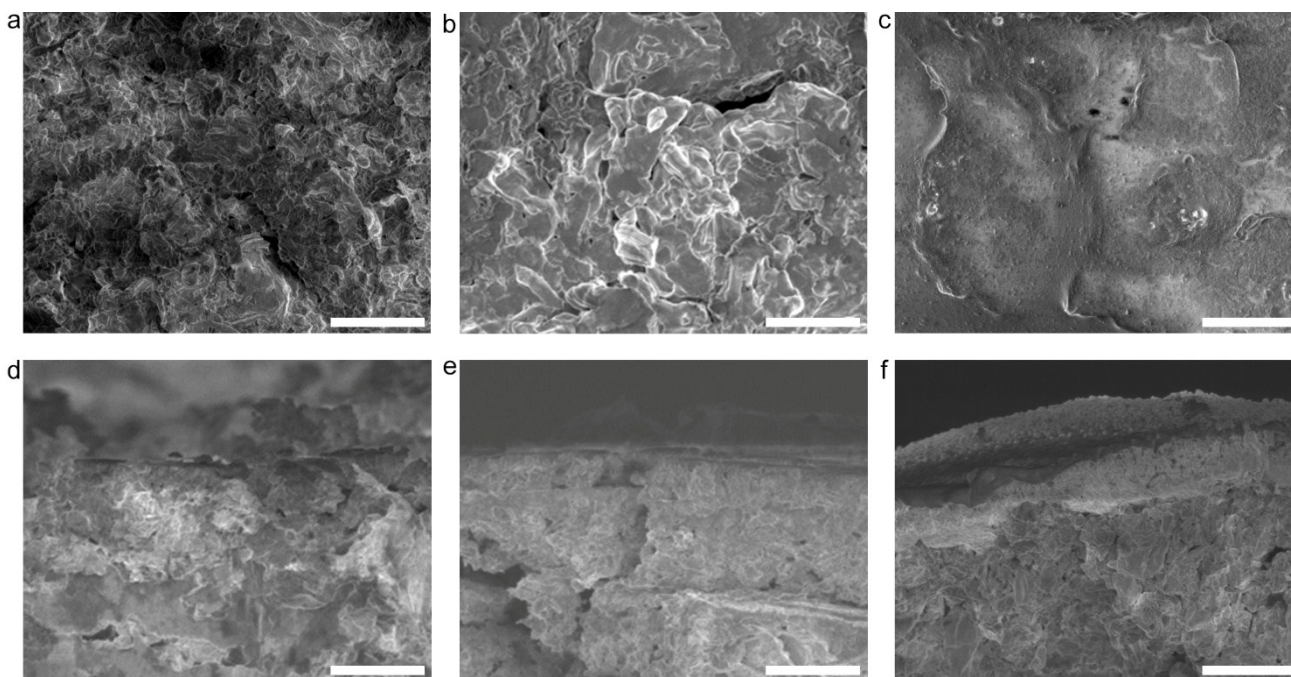

**Fig. S5** Top-view SEM images of (a) pristine Li, (b) Li|Li-Sb-alloy after cycling for 400 h and (c) Li|double-layer after cycling for 500 h. Cross-sectional SEM images of (d) pristine Li, (e) Li|Li-Sb-alloy after cycling for 400 h and (f) Li|double-layer after cycling for 500 h. The electrolyte was 1 M LiTFSI in DOL/DME (1:1, v/v). The white scale bars are 5  $\mu\text{m}$ .



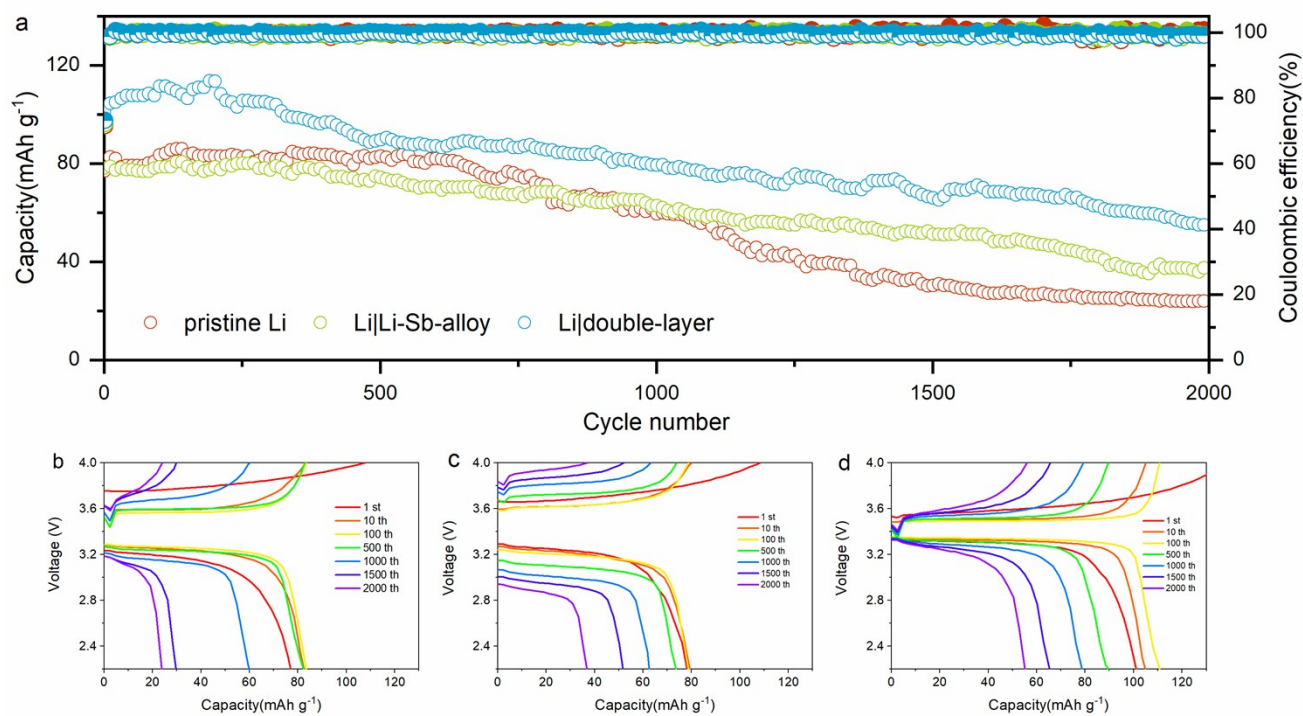

**Fig. S6** (a) Cycling performance of Li|LiFePO<sub>4</sub> full cells containing the pristine Li, Li|Li-Sb-alloy, and Li|double-layer at 5C (1C = 170 mA g<sup>-1</sup>). Charge/discharge curves of the Li|LiFePO<sub>4</sub> cells containing (b) pristine Li, (c) Li|Li-Sb-alloy, and (d) Li|double-layer. The electrolyte was 1 M LiPF<sub>6</sub> in EC/DEC (1:1, v/v).

## References

1. K. Liao, S. Wu, X. Mu, Q. Lu, M. Han, P. He, Z. Shao and H. Zhou, *Adv. Mater.*, 2018, **30**, 1705711.
2. Q. Pang, X. Liang, I. R. Kochetkov, P. Hartmann and L. F. Nazar, *Angew. Chem., Int. Ed.*, 2018, **57**, 9795-9798.
3. Z. Jiang, L. Jin, Z. Han, W. Hu, Z. Zeng, Y. Sun and J. Xie, *Angew. Chem., Int. Ed.*, 2019, **58**, 11374-11378.
4. Z. Tu, S. Choudhury, M. J. Zachman, S. Wei, K. Zhang, L. F. Kourkoutis and L. A. Archer, *Nat. Energy*, 2018, **3**, 310-316.
5. X. Liang, Q. Pang, I. R. Kochetkov, M. S. Sempere, H. Huang, X. Sun and L. F. Nazar, *Nat. Energy*, 2017, **2**, 17119.
6. Z. Hu, S. Zhang, S. Dong, W. Li, H. Li, G. Cui and L. Chen, *Chem. Mater.*, 2017, **29**, 4682-4689.
7. Q. Zhao, Z. Tu, S. Wei, K. Zhang, S. Choudhury, X. Liu and L. A. Archer, *Angew. Chem., Int. Ed.*, 2018, **57**, 992-996.
8. N.-W. Li, Y. Shi, Y.-X. Yin, X.-X. Zeng, J.-Y. Li, C.-J. Li, L.-J. Wan, R. Wen and Y.-G. Guo, *Angew. Chem., Int. Ed.*, 2018, **57**, 1505-1509.
9. Y. Zhang, W. Luo, C. Wang, Y. Li, C. Chen, J. Song, J. Dai, E. M. Hitz, S. Xu, C. Yang, Y. Wang and L. Hu, *Proc. Natl. Acad. Sci. U. S. A.*, 2017, **114**, 3584-3589.
10. D. Hong, Y. Choi, J. Ryu, J. Mun, W. Choi, M. Park, Y. Lee, N.-S. Choi, G. Lee, B.-S. Kim and S. Park, *J. Mater. Chem. A*, 2019, **7**, 20325-20334.
11. X. Wang, J. Zhuang, M. Liu, C. Wang, Y. Zhong, H. Wang, X. Cheng, S. Liu, G. Cao and W. Li, *J. Mater. Chem. A*, 2019, **7**, 19104-19111.
